# Supplementary material for: The Impact of Data Treatment Strategies on the Analysis of Bacterial Metabolomics Data
Source: Research Square preprint supplement (doi:10.21203/rs.3.rs-7433902/v1), 2025-09-01
Supplement: Supplementary file 1 [file 2e8fd021d90b69282862b74b.xlsx]

## Sheet: Ark1
Fraction	dataset	kurtosis	skewness	R2 fit to Gaussian distribution	KS test significant p value, %
Cells	raw	84.064	8.166	0.084	60
	log10	3.444	0.12	0.967	31
	mean center	9.005	0.577	0.761	31
	mean norm	677.77	9.517	0.04	100
	pareto norm	8.833	0.603	0.821	26
	autoscale norm	8.705	0.534	0.821	26
Supernatant	raw	76.314	8.299	0.025	55
	log10	3.349	0.071	0.947	77
	mean center	10.186	1.8	0.784	85
	mean norm	7.808	1.059	0.821	72
	pareto norm	7.128	0.982	0.851	60
	autoscale norm	7.232	0.877	0.87	53
