# Supplementary material for: The Impact of Data Treatment Strategies on the Analysis of Bacterial Metabolomics Data
Source: Research Square preprint supplement (doi:10.21203/rs.3.rs-7433902/v1), 2025-09-01
Supplement: Supplementary file 2 [file d6e7d74cbfa5ae2ec8641754.xlsx]

## Sheet: Ark1
					t-test significant p value, %
		Factor	Pairwise comparison		Cells	Supernatant
Strain test	Test for diffence between A and B strains	M1	SA	SB	0	60.26
			PA	PB	0	42.31
			SAPA	SBPB	0	2.56
		M2	SA	SB	2.56	14.1
			PA	PB	0	0
			SAPA	SBPB	1.71	11.54
		M3	SA	SB	4.27	2.56
			PA	PB	0	0
			SAPA	SBPB	0	1.28
	Test for diffence between clinical and lab strains	M1	Sc	Sl	0	1.28
			Pc	Pl	2.56	8.97
			SPc	SPl	6.84	20.51
		M2	Sc	Sl	5.98	33.33
			Pc	Pl	1.71	20.51
			SPc	SPl	30.77	10.26
		M3	Sc	Sl	0	26.92
			Pc	Pl	0	25.64
			SPc	SPl	7.69	14.1
Conditional test	Test for diffence between media	S	M1	M2	4.27	17.95
		P			32.48	37.18
		SP			22.22	26.92
		S	M2	M3	23.93	93.59
		P			41.03	88.46
		SP			33.33	75.64
		S	M1	M3	51.28	83.33
		P			58.12	75.64
		SP			43.59	75.64
